**Funding:** No specific funding was received from any funding bodies in the public, commercial or not-for-profit sectors to carry out the work described in this article.

**Disclosure statement:** The authors have declared no conflicts of interest.

**Naoto Sakumura<sup>1</sup>, Hitoshi Irabu<sup>1</sup>, Natsumi Inoue<sup>1</sup>, Mao Mizuta<sup>1</sup> and Masaki Shimizu<sup>1</sup>** 

<sup>1</sup>Department of Pediatrics, Graduate School of Medical Sciences, Kanazawa University, Kanazawa, Japan

Accepted 17 May 2019

Correspondence to: Masaki Shimizu, Department of Pediatrics, Graduate School of Medical Sciences, Kanazawa University, 13-1 Takaramachi, Kanazawa 920-8641, Japan. E-mail: shimizum@staff.kanazawa-u.ac.jp

## References

- 1 Nakaoka Y, Isobe M, Takei S *et al.* Efficacy and safety of tocilizumab in patients with refractory Takayasu arteritis: results from a randomised, double-blind, placebo-controlled, phase 3 trial in Japan (the TAKT study). *Ann Rheum Dis* 2018;77:348–54.
- 2 Mekinian A, Resche-Rigon M, Comarmond C *et al.* French Takayasu network. Efficacy of tocilizumab in Takayasu arteritis: multicenter retrospective study of 46 patients. *J Autoimmun* 2018;91:55–60.
- 3 Shimizu M, Nakagishi Y, Kasai K *et al.* Tocilizumab masks the clinical symptoms of systemic juvenile idiopathic arthritis-associated macrophage activation syndrome: the diagnostic significance of interleukin-18 and interleukin-6. *Cytokine* 2012;58:287–94.
- 4 Savioli B, Abdulahad WH, Brouwer E, Kallenberg CGM, de Souza A. Are cytokines and chemokines suitable biomarkers for Takayasu arteritis? *Autoimmun Rev* 2017;16:1071–8.
- 5 Pulsatelli L, Boiardi L, Assirelli E *et al.* Interleukin-6 and soluble interleukin-6 receptor are elevated in large-vessel vasculitis: a cross-sectional and longitudinal study. *Clin Exp Rheumatol* 2017;35:102–10.
- 6 Berger CT, Rebholz-Chaves B, Recher M, Manigold T, Daikeler T. Serial IL-6 measurements in patients with tocilizumab-treated large-vessel vasculitis detect infections and may predict early relapses. *Ann Rheum Dis* 2019; Advance Access published 22 January 2019, doi: 10.1136/annrheumdis-2018-214704.
- 7 Zhang X, Zhou J, Sun Y *et al.* <sup>18</sup>F-FDG-PET/CT: an accurate method to assess the activity of Takayasu's arteritis. *Clin Rheumatol* 2018;37:1927–35.
- 8 Han Q, Liang Q, Kang F *et al.* An increased major vessel uptake by <sup>18</sup>F-FDG-PET/CT in NIH criteria inactive patients with Takayasu's arteritis. *Clin Exp Rheumatol* 2018;36(Suppl 111):88–92.

*Rheumatology* 2020;59:254–256  
doi:10.1093/rheumatology/kez260  
Advance Access publication 10 July 2019

## Deficiency of adenosine deaminase 2: a case series revealing clinical manifestations, genotypes and treatment outcomes from Turkey

### Rheumatology key message

- Deficiency of adenosine deaminase 2 may present with amyloidosis, immunodeficiency and cytopenia in addition to vasculitic manifestations.

Dear Editor, Deficiency of adenosine deaminase 2 (DADA2) was first described in patients with biallelic mutations in the adenosine deaminase 2 (ADA2) gene on chromosome 22q11.1 and is characterized by recurrent fever, livedo racemosa and early onset strokes. Clinical manifestations of DADA2 may resemble the spectrum of polyarteritis nodosa (PAN) [1, 2]. Furthermore, several reports also suggested that DADA2 may cause broad spectrum manifestations, including only haematological involvement or lymphoproliferation [3, 4].

In this report, we share our experience of DADA2 in view of clinical manifestations, genotypes, treatment procedures and outcomes. Herein, we present five patients from three families, of which one, with renal amyloidosis successfully treated by canakinumab, was reported previously elsewhere [5].

The median age at symptom onset and DADA2 diagnosis were 10 (range, 10–13) and 15 (range, 11–25) years respectively. All patients were followed up for a median 12 months after DADA2 diagnosis. Persistent livedo racemosa was present in three patients, whereas abdominal pain ( $n=3$ ), hepatomegaly ( $n=3$ ), splenomegaly ( $n=3$ ), recurrent fever ( $n=2$ ), oral aphthous ( $n=1$ ), arthralgia ( $n=4$ ), arthritis ( $n=1$ ) and proteinuria/renal amyloidosis ( $n=1$ ) were the other prominent findings. Laboratory studies revealed mild lymphopenia and thrombocytopenia in two patients and one patient, respectively. Three patients had low serum IgM levels without recurrent infections and acute phase reactants were mildly elevated in four patients. Only two siblings with PAN-like phenotype underwent skin biopsy, which revealed necrotizing medium vessel vasculitis in the older brother, whereas the younger sister had non-specific vasculitis. Contrary to the majority of literature revealing the neurological aspects of DADA2, only one patient with a prior diagnosis of PAN had sensory neuropathy on routine EMG. The clinical characteristic, genotypes and treatment modalities are summarized in Table 1.

Beside the classical vasculitic phenotype of DADA2, unusual phenotypes such as cytopenia, lymphoproliferative disease and immunodeficiency have also been determined [3, 4]. Our patients are similar to the previous studies with the presence of previous PAN diagnosis in one patient, but fever and persistent livedo reticularis in three of five patients. We also introduce two patients without any signs of vasculitis, mainly presenting with systemic inflammation, hepatosplenomegaly, cytopenia and hypogammaglobulinaemia.

**TABLE 1** Clinical manifestations and ADA2 genotypes of patients with deficiency of adenosine deaminase 2

|                                | P1                                 |                                    | P2                                 |                                                                          | P3, sibling of P2                                                        |                                                                          | P4                        |                                    | P5, sibling of P4                                                                         |                                                                                           |
|--------------------------------|------------------------------------|------------------------------------|------------------------------------|--------------------------------------------------------------------------|--------------------------------------------------------------------------|--------------------------------------------------------------------------|---------------------------|------------------------------------|-------------------------------------------------------------------------------------------|-------------------------------------------------------------------------------------------|
|                                | F                                  | M                                  | F                                  | M                                                                        | F                                                                        | M                                                                        | F                         | M                                  | F                                                                                         | M                                                                                         |
| Gender                         | Yes                                | Yes                                | Yes                                | Yes                                                                      | Yes                                                                      | Yes                                                                      | Yes                       | Yes                                | Yes                                                                                       | Yes                                                                                       |
| Consanguinity                  | 10                                 | 12                                 | 10                                 | 10                                                                       | 13                                                                       | 13                                                                       | 10                        | 13                                 | 10                                                                                        | 10                                                                                        |
| Age at disease onset, years    | 20                                 | 15                                 | 15                                 | 25                                                                       | 13.5                                                                     | 13.5                                                                     | 11                        | 11                                 | 11                                                                                        | 11                                                                                        |
| Age at diagnosis, years        | No                                 | Yes                                | Yes                                | Yes                                                                      | No                                                                       | No                                                                       | No                        | No                                 | No                                                                                        | No                                                                                        |
| Recurrent fever                | No                                 | Yes                                | Yes                                | No                                                                       | No                                                                       | No                                                                       | No                        | No                                 | No                                                                                        | No                                                                                        |
| Oral aphthous                  | Persistent livedo racemosa         | Persistent livedo racemosa         | Persistent livedo racemosa         | Persistent livedo racemosa                                               | Persistent livedo racemosa                                               | Persistent livedo racemosa                                               | None                      | None                               | None                                                                                      | None                                                                                      |
| Skin symptoms                  | Abdominal pain                     | Abdominal pain                     | No                                 | Abdominal pain                                                           | Abdominal pain                                                           | Abdominal pain                                                           | No                        | Abdominal pain                     | Abdominal pain                                                                            | Abdominal pain                                                                            |
| Gastrointestinal symptoms      | No                                 | No                                 | No                                 | No                                                                       | No                                                                       | No                                                                       | No                        | No                                 | No                                                                                        | No                                                                                        |
| Myalgia                        | No/Yes                             | No/Yes                             | No/Yes                             | No/Yes                                                                   | No/Yes                                                                   | No/Yes                                                                   | Yes/Yes                   | Yes/Yes                            | No/Yes                                                                                    | No/Yes                                                                                    |
| Arthritis/arthralgia           | Mild lymphopenia                   | Mild lymphopenia                   | No                                 | Mild lymphopenia                                                         | Mild lymphopenia                                                         | Mild lymphopenia                                                         | No                        | Mild lymphopenia, Thrombocytopenia | Mild lymphopenia, Thrombocytopenia                                                        | Mild lymphopenia, Thrombocytopenia                                                        |
| Haematological involvement     | Low serum IgM                      | Low serum IgM                      | Normal                             | Normal                                                                   | Normal                                                                   | Normal                                                                   | Low serum IgM             | Low serum IgM                      | Low serum IgM                                                                             | Low serum IgM                                                                             |
| Immunological involvement      | No                                 | Yes                                | Yes                                | Immunoglobulins                                                          | Immunoglobulins                                                          | Immunoglobulins                                                          | Yes                       | Yes                                | Yes                                                                                       | Yes                                                                                       |
| Elevation of APRs              | No                                 | No                                 | No                                 | No                                                                       | No                                                                       | No                                                                       | No                        | No                                 | No                                                                                        | No                                                                                        |
| Autoantibodies                 | No/No                              | No/No                              | No/No                              | No/No                                                                    | No/No                                                                    | No/No                                                                    | Yes/Yes                   | Yes/Yes                            | Yes/Yes                                                                                   | Yes/Yes                                                                                   |
| Hepatomegaly/splenomegaly      | No                                 | No                                 | No                                 | No                                                                       | No                                                                       | No                                                                       | Proteinuria               | Proteinuria                        | Proteinuria                                                                               | Proteinuria                                                                               |
| Renal involvement              | ND                                 | ND                                 | ND                                 | ND                                                                       | ND                                                                       | ND                                                                       | Renal amyloidosis         | Renal amyloidosis                  | Renal amyloidosis                                                                         | Renal amyloidosis                                                                         |
| Previous treatment             | Etanercept for 8 months            | Etanercept for 8 months            | Etanercept for 8 months            | Etanercept for 8 months                                                  | Etanercept for 8 months                                                  | Etanercept for 8 months                                                  | Systemic steroid, NSAID   | Systemic steroid, CSA, colchicine  | Systemic steroid, CSA, colchicine                                                         | Systemic steroid, CSA, colchicine                                                         |
| Current treatment and duration | No                                 | Normal                             | Normal                             | Etanercept for 8 months                                                  | Etanercept for 8 months                                                  | Etanercept for 8 months                                                  | Canakinumab for 21 months | Canakinumab for 21 months          | Etanercept for 8 months and IVIG for three months                                         | Etanercept for 8 months and IVIG for three months                                         |
| Neurological symptoms          | Normal                             | Normal                             | Normal                             | No                                                                       | No                                                                       | No                                                                       | No                        | No                                 | No                                                                                        | No                                                                                        |
| EMG                            | Normal                             | Normal                             | Normal                             | Sensory neuropathy                                                       | Sensory neuropathy                                                       | Sensory neuropathy                                                       | Normal                    | Normal                             | Normal                                                                                    | Normal                                                                                    |
| Cranial MRI                    | Normal                             | Normal                             | Normal                             | NA                                                                       | NA                                                                       | NA                                                                       | Normal                    | Normal                             | Normal                                                                                    | Normal                                                                                    |
| Renal and portal Doppler US    | Normal                             | Normal                             | Normal                             | Normal                                                                   | Normal                                                                   | Normal                                                                   | Normal                    | Normal                             | Normal                                                                                    | Normal                                                                                    |
| Skin biopsy result             | NA                                 | NA                                 | NA                                 | Hydropic degeneration in basal layer, perivascular lymphocytes in dermis | Hydropic degeneration in basal layer, perivascular lymphocytes in dermis | Hydropic degeneration in basal layer, perivascular lymphocytes in dermis | NA                        | NA                                 | NA                                                                                        | NA                                                                                        |
| ADA2 gene sequencing result    | Y453C/Y453C                        | Y453C/Y453C                        | Y453C/Y453C                        | G47R/G47R                                                                | G47R/G47R                                                                | G47R/G47R                                                                | T317Rfs*25/<br>T317Rfs*25 | T317Rfs*25/<br>T317Rfs*25          | T317Rfs*25/<br>T317Rfs*25                                                                 | T317Rfs*25/<br>T317Rfs*25                                                                 |
| Plasma ADA2 activity           | 0 mU/g protein                     | 0 mU/g protein                     | 0 mU/g protein                     | 0 mU/g protein                                                           | 0 mU/g protein                                                           | 0 mU/g protein                                                           | 0 mU/g protein            | 0 mU/g protein                     | 0 mU/g protein                                                                            | 0 mU/g protein                                                                            |
| Outcome                        | Marked improvement in skin lesions | Marked improvement in skin lesions | Marked improvement in skin lesions | Decrease in febrile episodes and marked improvement in skin lesions      | Decrease in febrile episodes and marked improvement in skin lesions      | Decrease in febrile episodes and marked improvement in skin lesions      | Proteinuria disappeared   | Proteinuria disappeared            | APR decreased with etanercept treatment, cytopenia improved after first IVIG replacement. | APR decreased with etanercept treatment, cytopenia improved after first IVIG replacement. |

ADA2: adenosine deaminase 2; APR: acute phase reactant; CSA: ciclosporin A; EMG: electromyogram; NA: not applicable; ND: not determined. Autoantibodies included anti-nuclear antibody, anti-DNA, anti-cardiolipin IgM/IgG and anti-phospholipid IgM/IgG.

Genotype–phenotype correlation was studied in case series from different parts of the world. Firstly, the most frequent mutations were G47R in Turkish and Georgian ancestry, and R169Q in the European population. Previous studies linked G47R mutation with poor prognosis and PAN-like phenotype rather than livedo reticularis with CNS disease [6]. Additionally, Van Montfrans *et al.* suggested that median ADA2 activity was significantly lower in patients with stroke [7]. In contrast, all of our patients with absent ADA2 activity have not had neurological involvement including stroke so far.

We have been treating four of our patients with etanercept, of which one was cotreated with monthly IVIG replacement for resistant bicytopenia. All of them had favourable clinical and laboratory response without significant side effects. The remaining one patient was successfully treated with monthly canakinumab for renal amyloidosis, as we reported before [5]. However, there are still many questions and doubts on the treatment of DADA2. We do not know exactly with what drug and when to start therapy, or in addition how long patients should be on therapy. Anti-TNF agents, including etanercept and adalimumab, were the most commonly reported with benefits in improving the vasculitic signs and preventing strokes. Even though corticosteroids were reported to control the symptoms, patients usually became steroid dependent. Cyclophosphamide, methotrexate, azathioprine and calcineurin inhibitors yielded a little success. Although several patients with documented hypogammaglobulinaemia underwent IVIG replacement, its effects on disease symptoms and outcomes are not known [8]. One recent paper was novel in demonstrating the benefits of allogenic haematopoietic cell transplantation on both clinical symptoms and ADA2 activity [7]. Further studies are needed to investigate the role of ADA2 and enzymatic replacement or haematopoietic cell transplantation on the treatment of DADA2. Beside the aforementioned treatment options, we believe that recombinant ADA2 enzyme may be a more curative treatment option in the future. Until then, physicians may consider anti-TNF agents for vasculitis phenotype, anti-IL1 agents for amyloidosis and adding IVIG replacement for symptomatic immunodeficiencies or resistant cytopenia.

In conclusion, DADA2 is now known to present not only with vasculitis or PAN-like phenotype but also with amyloidosis, immunodeficiency and cytopenia. Nonetheless, livedo reticularis, fever, early-onset stroke, splenomegaly, lymphopenia and hypogammaglobulinaemia should be the clues for a DADA2 diagnosis. Further prospective multicentre, even international studies are needed to confirm the genotype–phenotype correlations and efficacy of different treatment modalities in DADA2.

**Funding:** No specific funding was received from any funding bodies in the public, commercial or not-for-profit sectors to carry out the work described in this manuscript.

**Disclosure statement:** The authors have declared no conflicts of interest.

**Rabia Miray Kisla Ekinci** <sup>1</sup>, **Sibel Balci**<sup>1</sup>, **Michael Hershfield**<sup>2</sup>, **Atil Bisgin**<sup>3</sup>, **Dilek Dogruel**<sup>4</sup>, **Derya Ufuk Altintas**<sup>4</sup> and **Mustafa Yilmaz**<sup>1</sup>

<sup>1</sup>Department of Pediatric Rheumatology, Cukurova University Faculty of Medicine, Adana, Turkey, <sup>2</sup>Department of Medicine and Biochemistry, Duke University School of Medicine, Durham, NC, USA, <sup>3</sup>Department of Medical Genetics and <sup>4</sup>Department of Pediatric Allergy and Immunology, Cukurova University Faculty of Medicine, Adana, Turkey

Accepted 3 June 2019

Correspondence to: Rabia Miray Kisla Ekinci, Department of Pediatric Rheumatology, Cukurova University Faculty of Medicine, Adana, Turkey. E-mail: mir\_kisla@hotmail.com

## References

- Navon Elkan P, Pierce SB, Segel R *et al.* Mutant adenosine deaminase 2 in a polyarteritis nodosa vasculopathy. *N Engl J Med* 2014;370:921–31.
- Zhou Q, Yang D, Ombrello AK *et al.* Early-onset stroke and vasculopathy associated with mutations in ADA2. *N Engl J Med* 2014;370:911–20.
- Michniacki TF, Hannibal M, Ross CW *et al.* Hematologic manifestations of deficiency of adenosine deaminase 2 (DADA2) and response to tumor necrosis factor inhibition in DADA2-associated bone marrow failure. *J Clin Immunol* 2018;38:166–73.
- Trotta L, Martelius T, Siitonen T *et al.* ADA2 deficiency: clonal lymphoproliferation in a subset of patients. *J Allergy Clin Immunol* 2018;141:1534–7.e8.
- Kisla Ekinci RM, Balci S, Bisgin A *et al.* Renal amyloidosis in deficiency of adenosine deaminase 2: successful experience with canakinumab. *Pediatrics* 2018;142:p11: e20180948.
- Caorsi R, Penco F, Schena F, Gattorno M. Monogenic polyarteritis: the lesson of ADA2 deficiency. *Pediatr Rheumatol Online J* 2016;14:51.
- Van Montfrans JM, Hartman EA, Braun KP *et al.* Phenotypic variability in patients with ADA2 deficiency due to identical homozygous R169Q mutations. *Rheumatology (Oxford)* 2016;55:902–10.
- Meyts I, Aksentijevich I. Deficiency of adenosine deaminase 2 (DADA2): updates on the phenotype, genetics, pathogenesis, and treatment. *J Clin Immunol* 2018;38:569–78.

*Rheumatology* 2020;59:256–259

doi:10.1093/rheumatology/kez262

Advance Access publication 10 July 2019

## Efficacy of abatacept for Felty's syndrome

### Rheumatology key message

- Abatacept might be a novel therapy in place of rituximab for FS, particularly in cases with severe neutropenia.

SIR, FS is defined as the presence of RA, neutropenia and splenomegaly. FS occurs in a subset of fewer than 1% of
